# Supplementary material for: Differences in coagulopathy indices in patients with severe versus non-severe COVID-19: a meta-analysis of 35 studies and 6427 patients
Source: PubMed Central journal article supplement (PMC8128869; doi:10.1038/s41598-021-89967-x), 2021-05-17

**Online supplement to:**

**Differences in coagulopathy indices in patients with severe versus non-severe COVID-19: A Meta-analysis of 35 Studies and 6427 Patients**

Alberto Polimeni<sup>1,2</sup>, MD, PhD, Isabella Leo, MD<sup>1</sup>, Carmen Spaccarotella<sup>1,2</sup>, MD, Annalisa Mongiardo<sup>1</sup>, MD, Sabato Sorrentino<sup>1,2</sup>, MD, PhD, Jolanda Sabatino<sup>1,2</sup>, MD, PhD, Salvatore De Rosa<sup>1,2</sup>, MD, PhD, Ciro Indolfi<sup>1,2,3</sup>, MD

**Affiliations:**

Division of Cardiology<sup>1</sup> and Center for Cardiovascular Research<sup>2</sup>, Department of Medical and Surgical Sciences, Magna Graecia University, Catanzaro, Italy. Mediterranea Cardiocentro, Naples, Italy<sup>3</sup>.

## Supplemental Table 1 - MOOSE Checklist

A reporting checklist for Authors, Editors, and Reviewers of Meta-analyses of Observational Studies. You must report the page number in your manuscript where you consider each of the items listed in this checklist. If you have not included this information, either revise your manuscript accordingly before submitting or note N/A.

| Reporting Criteria                                                                                              | Reported (Yes/No) | Reported on Page No. |
|-----------------------------------------------------------------------------------------------------------------|-------------------|----------------------|
| <b>Reporting of Background</b>                                                                                  |                   |                      |
| Problem definition                                                                                              | Yes               | 4                    |
| Hypothesis statement                                                                                            | Yes               | 4                    |
| Description of Study Outcome(s)                                                                                 | Yes               | 7,8                  |
| Type of exposure or intervention used                                                                           | Yes               | 5                    |
| Type of study design used                                                                                       | Yes               | 5                    |
| Study population                                                                                                | Yes               | 7                    |
| <b>Reporting of Search Strategy</b>                                                                             |                   |                      |
| Qualifications of searchers (eg, librarians and investigators)                                                  | Yes               | 5                    |
| Search strategy, including time period included in the synthesis and keywords                                   | Yes               | 4,5                  |
| Effort to include all available studies, including contact with authors                                         | Yes               | 5                    |
| Databases and registries searched                                                                               | Yes               | 4                    |
| Search software used, name and version, including special features used (eg, explosion)                         | Yes               | 4                    |
| Use of hand searching (eg, reference lists of obtained articles)                                                | Yes               | 5                    |
| List of citations located and those excluded, including justification                                           | Yes               | 7                    |
| Method for addressing articles published in languages other than English                                        | Yes               | 5                    |
| Method of handling abstracts and unpublished studies                                                            | Yes               | 5                    |
| Description of any contact with authors                                                                         | Yes               | 5                    |
| <b>Reporting of Methods</b>                                                                                     |                   |                      |
| Description of relevance or appropriateness of studies assembled for assessing the hypothesis to be tested      | Yes               | 5                    |
| Rationale for the selection and coding of data (eg, sound clinical principles or convenience)                   | Yes               | 5                    |
| Documentation of how data were classified and coded (eg, multiple raters, blinding, and interrater reliability) | Yes               | 5                    |
| Assessment of confounding (eg, comparability of cases and controls in studies where appropriate)                | Yes               | 6                    |

| Reporting Criteria                                                                                                                                                                                                                                                           | Reported (Yes/No)                | Reported on Page No.               |
|------------------------------------------------------------------------------------------------------------------------------------------------------------------------------------------------------------------------------------------------------------------------------|----------------------------------|------------------------------------|
| Assessment of study quality, including blinding of quality assessors; stratification or regression on possible predictors of study results                                                                                                                                   | <input type="text" value="Yes"/> | <input type="text" value="5"/>     |
| Assessment of heterogeneity                                                                                                                                                                                                                                                  | <input type="text" value="Yes"/> | <input type="text" value="6"/>     |
| Description of statistical methods (eg, complete description of fixed or random effects models, justification of whether the chosen models account for predictors of study results, dose-response models, or cumulative meta-analysis) in sufficient detail to be replicated | <input type="text" value="Yes"/> | <input type="text" value="6"/>     |
| Provision of appropriate tables and graphics                                                                                                                                                                                                                                 | <input type="text" value="Yes"/> | <input type="text" value="5,7,8"/> |
| <b>Reporting of Results</b>                                                                                                                                                                                                                                                  |                                  |                                    |
| Table giving descriptive information for each study included                                                                                                                                                                                                                 | <input type="text" value="Yes"/> | <input type="text" value="7"/>     |
| Results of sensitivity testing (eg, subgroup analysis)                                                                                                                                                                                                                       | <input type="text" value="Yes"/> | <input type="text" value="8"/>     |
| Indication of statistical uncertainty of findings                                                                                                                                                                                                                            | <input type="text" value="Yes"/> | <input type="text" value="7,8"/>   |
| <b>Reporting of Discussion</b>                                                                                                                                                                                                                                               |                                  |                                    |
| Quantitative assessment of bias (eg, publication bias)                                                                                                                                                                                                                       | <input type="text" value="Yes"/> | <input type="text" value="6"/>     |
| Justification for exclusion (eg, exclusion of non-English-language citations)                                                                                                                                                                                                | <input type="text" value="Yes"/> | <input type="text" value="5"/>     |
| Assessment of quality of included studies                                                                                                                                                                                                                                    | <input type="text" value="Yes"/> | <input type="text" value="5"/>     |
| <b>Reporting of Conclusions</b>                                                                                                                                                                                                                                              |                                  |                                    |
| Consideration of alternative explanations for observed results                                                                                                                                                                                                               | <input type="text" value="Yes"/> | <input type="text" value="10"/>    |
| Generalization of the conclusions (ie, appropriate for the data presented and within the domain of the literature review)                                                                                                                                                    | <input type="text" value="Yes"/> | <input type="text" value="9,10"/>  |
| Guidelines for future research                                                                                                                                                                                                                                               | <input type="text" value="Yes"/> | <input type="text" value="10"/>    |
| Disclosure of funding source                                                                                                                                                                                                                                                 | <input type="text" value="Yes"/> | <input type="text" value="1"/>     |

Once you have completed this checklist, please save a copy and upload it as part of your submission. DO NOT include this checklist as part of the main manuscript document. It must be uploaded as a separate file.

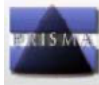

# PRISMA 2009 Checklist

Supplemental Table 2 – Prisma Checklist

| Section/topic                      | #  | Checklist item                                                                                                                                                                                                                                                                                              | Reported on page # |
|------------------------------------|----|-------------------------------------------------------------------------------------------------------------------------------------------------------------------------------------------------------------------------------------------------------------------------------------------------------------|--------------------|
| <b>TITLE</b>                       |    |                                                                                                                                                                                                                                                                                                             |                    |
| Title                              | 1  | Identify the report as a systematic review, meta-analysis, or both.                                                                                                                                                                                                                                         | 1                  |
| <b>ABSTRACT</b>                    |    |                                                                                                                                                                                                                                                                                                             |                    |
| Structured summary                 | 2  | Provide a structured summary including, as applicable: background; objectives; data sources; study eligibility criteria, participants, and interventions; study appraisal and synthesis methods; results; limitations; conclusions and implications of key findings; systematic review registration number. | 2                  |
| <b>INTRODUCTION</b>                |    |                                                                                                                                                                                                                                                                                                             |                    |
| Rationale                          | 3  | Describe the rationale for the review in the context of what is already known.                                                                                                                                                                                                                              | 4                  |
| Objectives                         | 4  | Provide an explicit statement of questions being addressed with reference to participants, interventions, comparisons, outcomes, and study design (PICOS).                                                                                                                                                  | 4                  |
| <b>METHODS</b>                     |    |                                                                                                                                                                                                                                                                                                             |                    |
| Protocol and registration          | 5  | Indicate if a review protocol exists, if and where it can be accessed (e.g., Web address), and, if available, provide registration information including registration number.                                                                                                                               | NA                 |
| Eligibility criteria               | 6  | Specify study characteristics (e.g., PICOS, length of follow-up) and report characteristics (e.g., years considered, language, publication status) used as criteria for eligibility, giving rationale.                                                                                                      | 5                  |
| Information sources                | 7  | Describe all information sources (e.g., databases with dates of coverage, contact with study authors to identify additional studies) in the search and date last searched.                                                                                                                                  | 5                  |
| Search                             | 8  | Present full electronic search strategy for at least one database, including any limits used, such that it could be repeated.                                                                                                                                                                               | 5                  |
| Study selection                    | 9  | State the process for selecting studies (i.e., screening, eligibility, included in systematic review, and, if applicable, included in the meta-analysis).                                                                                                                                                   | 5                  |
| Data collection process            | 10 | Describe method of data extraction from reports (e.g., piloted forms, independently, in duplicate) and any processes for obtaining and confirming data from investigators.                                                                                                                                  | 5,6                |
| Data items                         | 11 | List and define all variables for which data were sought (e.g., PICOS, funding sources) and any assumptions and simplifications made.                                                                                                                                                                       | 5,6                |
| Risk of bias in individual studies | 12 | Describe methods used for assessing risk of bias of individual studies (including specification of whether this was done at the study or outcome level), and how this information is to be used in any data synthesis.                                                                                      | 6                  |
| Summary measures                   | 13 | State the principal summary measures (e.g., risk ratio, difference in means).                                                                                                                                                                                                                               | 6                  |
| Synthesis of results               | 14 | Describe the methods of handling data and combining results of studies, if done, including measures of consistency (e.g., $I^2$ ) for each meta-analysis.                                                                                                                                                   | 6                  |

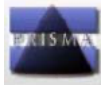

# PRISMA 2009 Checklist

| Section/topic                 | #  | Checklist item                                                                                                                                                                                           | Reported on page # |
|-------------------------------|----|----------------------------------------------------------------------------------------------------------------------------------------------------------------------------------------------------------|--------------------|
| Risk of bias across studies   | 15 | Specify any assessment of risk of bias that may affect the cumulative evidence (e.g., publication bias, selective reporting within studies).                                                             | 6                  |
| Additional analyses           | 16 | Describe methods of additional analyses (e.g., sensitivity or subgroup analyses, meta-regression), if done, indicating which were pre-specified.                                                         | 6                  |
| <b>RESULTS</b>                |    |                                                                                                                                                                                                          |                    |
| Study selection               | 17 | Give numbers of studies screened, assessed for eligibility, and included in the review, with reasons for exclusions at each stage, ideally with a flow diagram.                                          | 7                  |
| Study characteristics         | 18 | For each study, present characteristics for which data were extracted (e.g., study size, PICOS, follow-up period) and provide the citations.                                                             | 7                  |
| Risk of bias within studies   | 19 | Present data on risk of bias of each study and, if available, any outcome level assessment (see item 12).                                                                                                | 8                  |
| Results of individual studies | 20 | For all outcomes considered (benefits or harms), present, for each study: (a) simple summary data for each intervention group (b) effect estimates and confidence intervals, ideally with a forest plot. | 7,8                |
| Synthesis of results          | 21 | Present results of each meta-analysis done, including confidence intervals and measures of consistency.                                                                                                  | 7,8                |
| Risk of bias across studies   | 22 | Present results of any assessment of risk of bias across studies (see Item 15).                                                                                                                          | 8                  |
| Additional analysis           | 23 | Give results of additional analyses, if done (e.g., sensitivity or subgroup analyses, meta-regression [see Item 16]).                                                                                    | 8                  |
| <b>DISCUSSION</b>             |    |                                                                                                                                                                                                          |                    |
| Summary of evidence           | 24 | Summarize the main findings including the strength of evidence for each main outcome; consider their relevance to key groups (e.g., healthcare providers, users, and policy makers).                     | 9,10               |
| Limitations                   | 25 | Discuss limitations at study and outcome level (e.g., risk of bias), and at review-level (e.g., incomplete retrieval of identified research, reporting bias).                                            | 10                 |
| Conclusions                   | 26 | Provide a general interpretation of the results in the context of other evidence, and implications for future research.                                                                                  | 10                 |
| <b>FUNDING</b>                |    |                                                                                                                                                                                                          |                    |
| Funding                       | 27 | Describe sources of funding for the systematic review and other support (e.g., supply of data); role of funders for the systematic review.                                                               | 14                 |

From: Moher D, Liberati A, Tetzlaff J, Altman DG, The PRISMA Group (2009). Preferred Reporting Items for Systematic Reviews and Meta-Analyses: The PRISMA Statement. PLoS Med 6(7): e1000097. doi:10.1371/journal.pmed1000097

For more information, visit: [www.prisma-statement.org](http://www.prisma-statement.org).

## Supplemental Table 3 - QUALITY ASSESSMENT AHRQ

|                     | 1   | 2   | 3   | 4       | 5       | 6   | 7       | 8   | 9   | 10  | 11 |
|---------------------|-----|-----|-----|---------|---------|-----|---------|-----|-----|-----|----|
| <i>Cai Q.</i>       | Yes | Yes | Yes | Unclear | Unclear | Yes | No      | Yes | No  | No  | No |
| <i>Chen G.</i>      | Yes | Yes | Yes | Unclear | Unclear | Yes | No      | Yes | No  | No  | No |
| <i>Chen T.</i>      | Yes | Yes | Yes | Unclear | Unclear | Yes | No      | No  | No  | Yes | No |
| <i>Deng Q.</i>      | Yes | Yes | Yes | Unclear | Unclear | No  | No      | No  | No  | No  | No |
| <i>Gao Y.</i>       | Yes | Yes | Yes | Unclear | Unclear | No  | No      | Yes | No  | No  | No |
| <i>Han H.</i>       | Yes | Yes | Yes | Unclear | Unclear | No  | No      | No  | No  | No  | No |
| <i>Huang C.</i>     | Yes | Yes | Yes | Unclear | Unclear | Yes | No      | No  | No  | No  | No |
| <i>Huang H.</i>     | Yes | Yes | Yes | Unclear | Unclear | Yes | Yes     | Yes | No  | No  | No |
| <i>Li J.</i>        | Yes | Yes | Yes | Unclear | Unclear | No  | Yes     | Yes | No  | No  | No |
| <i>Li K.</i>        | Yes | Yes | Yes | Unclear | Unclear | Yes | Unclear | Yes | No  | No  | No |
| <i>Li Z.</i>        | Yes | Yes | Yes | Unclear | Unclear | Yes | No      | No  | No  | No  | No |
| <i>Liu Jiacheng</i> | Yes | Yes | Yes | Unclear | Unclear | No  | No      | Yes | No  | No  | No |
| <i>Liu Jing</i>     | Yes | Yes | Yes | Unclear | Unclear | No  | Yes     | Yes | No  | No  | No |
| <i>Lu H.</i>        | Yes | Yes | Yes | Unclear | Unclear | No  | No      | No  | No  | No  | No |
| <i>Lu Z.</i>        | Yes | Yes | Yes | Yes     | Unclear | Yes | Yes     | Yes | Yes | No  | No |
| <i>Luo X.</i>       | Yes | Yes | Yes | Unclear | Unclear | No  | Yes     | No  | No  | No  | No |
| <i>Ma K.</i>        | Yes | Yes | Yes | Yes     | Unclear | Yes | Yes     | Yes | No  | Yes | No |
| <i>Qian G.</i>      | Yes | Yes | Yes | Unclear | Unclear | No  | No      | No  | Yes | No  | No |
| <i>Tang N.</i>      | Yes | Yes | Yes | Yes     | Unclear | No  | No      | Yes | No  | No  | No |
| <i>Wan S.</i>       | Yes | Yes | Yes | Unclear | Unclear | No  | No      | Yes | No  | No  | No |
| <i>Wang D.</i>      | Yes | Yes | Yes | Yes     | Unclear | No  | No      | No  | No  | No  | No |
| <i>Wang K.</i>      | Yes | Yes | Yes | Unclear | Unclear | No  | Yes     | Yes | No  | Yes | No |
| <i>Wang L.</i>      | Yes | Yes | Yes | Yes     | Unclear | Yes | Yes     | No  | No  | No  | No |
| <i>Wu C.</i>        | Yes | Yes | Yes | Unclear | Unclear | No  | No      | No  | Yes | Yes | No |
| <i>Wu J.</i>        | Yes | Yes | Yes | Unclear | Unclear | No  | No      | Yes | No  | No  | No |
| <i>Xu Y.</i>        | Yes | Yes | Yes | Yes     | Unclear | No  | Yes     | No  | No  | No  | No |
| <i>Zeng J.</i>      | Yes | Yes | Yes | Unclear | Unclear | No  | No      | No  | No  | No  | No |
| <i>Zhang F.</i>     | Yes | Yes | Yes | Yes     | Unclear | No  | Yes     | No  | No  | No  | No |
| <i>Zhang G.</i>     | Yes | Yes | Yes | Unclear | Unclear | No  | No      | No  | Yes | No  | No |
| <i>Zhang J.</i>     | Yes | Yes | Yes | Unclear | Unclear | Yes | No      | Yes | No  | No  | No |
| <i>Zheng C.</i>     | Yes | Yes | Yes | Unclear | Unclear | No  | No      | No  | No  | No  | No |
| <i>Zheng X.</i>     | Yes | Yes | Yes | Unclear | Unclear | Yes | Yes     | Yes | No  | Yes | No |
| <i>Zhou F.</i>      | Yes | Yes | Yes | Unclear | Unclear | Yes | Yes     | Yes | No  | No  | No |
| <i>Zhou Ying</i>    | Yes | Yes | Yes | Unclear | Unclear | Yes | Yes     | Yes | Yes | No  | No |
| <i>Zhou Yulong</i>  | Yes | Yes | Yes | Unclear | Unclear | No  | No      | Yes | No  | No  | No |

1) Define the source of information; 2) List inclusion and exclusion criteria for exposed and unexposed subjects (cases and controls) or refer to previous publications;3) Indicate time period used for identifying patients;4) Indicate whether or not subjects were consecutive if not population-based;5) Indicate if evaluators of subjective components of study were masked to other aspects of the status of the participants;6) Describe any assessments undertaken for quality assurance purposes (e.g., test/retest of primary outcome measurements);7) Explain any patient exclusions from analysis;8) Describe how confounding was assessed and/or controlled.;9) If applicable, explain how missing data were handled in the analysis;10) Summarize patient response rates and completeness of data collection;11) Clarify what follow-up, if any, was expected and the percentage of patients for which incomplete data or follow-up was obtained

# Supplemental Figure 1

## A D-dimer

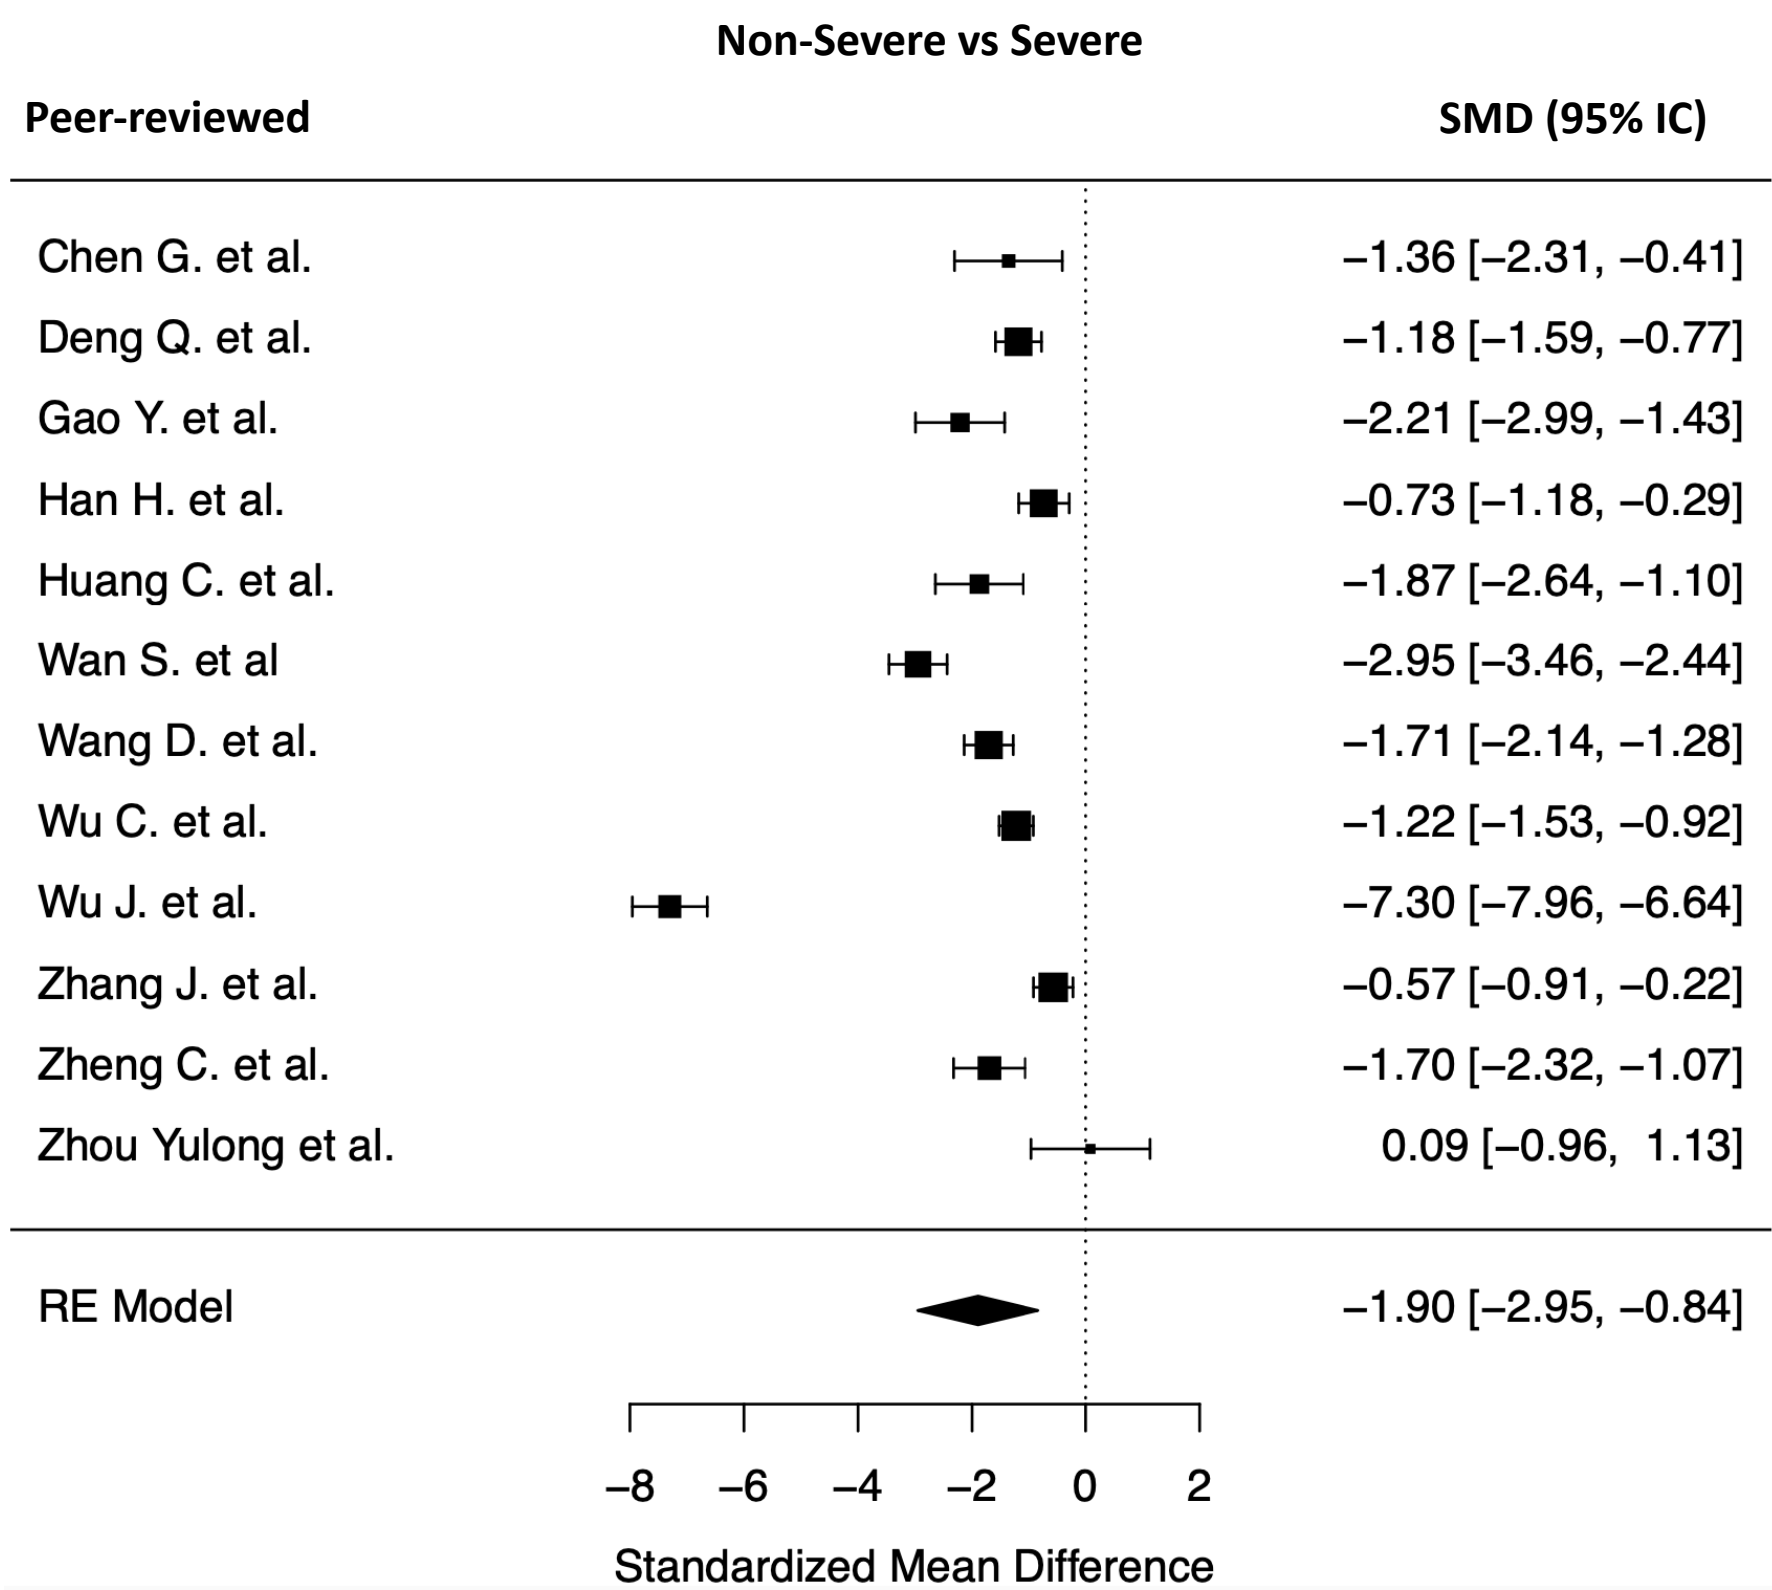

## B D-dimer

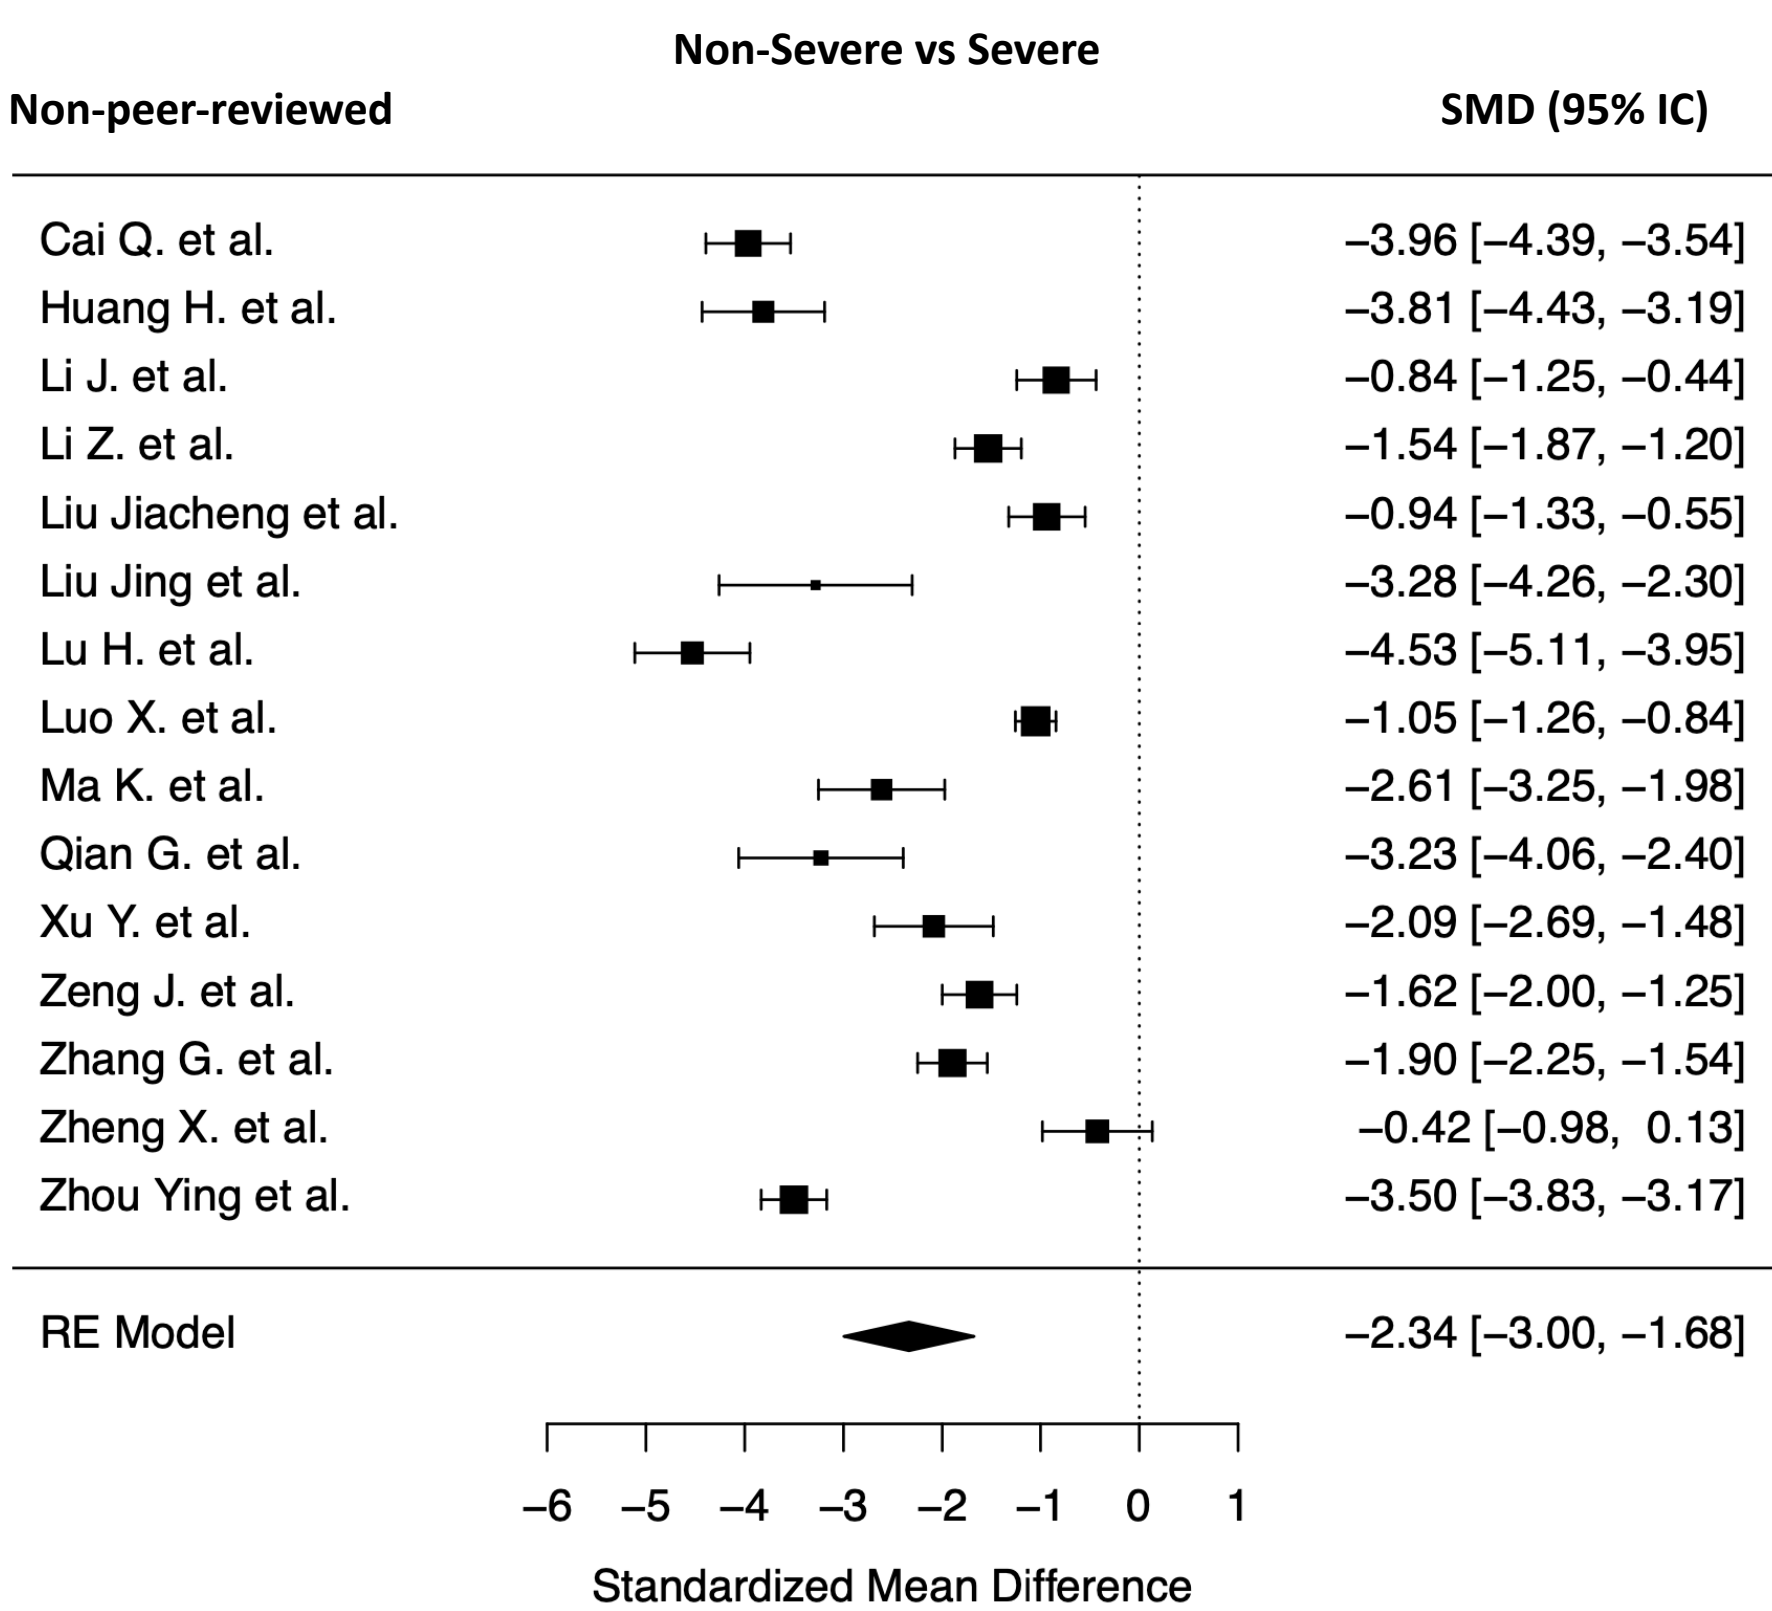

## A Sensitivity Analysis for D-dimer outcome

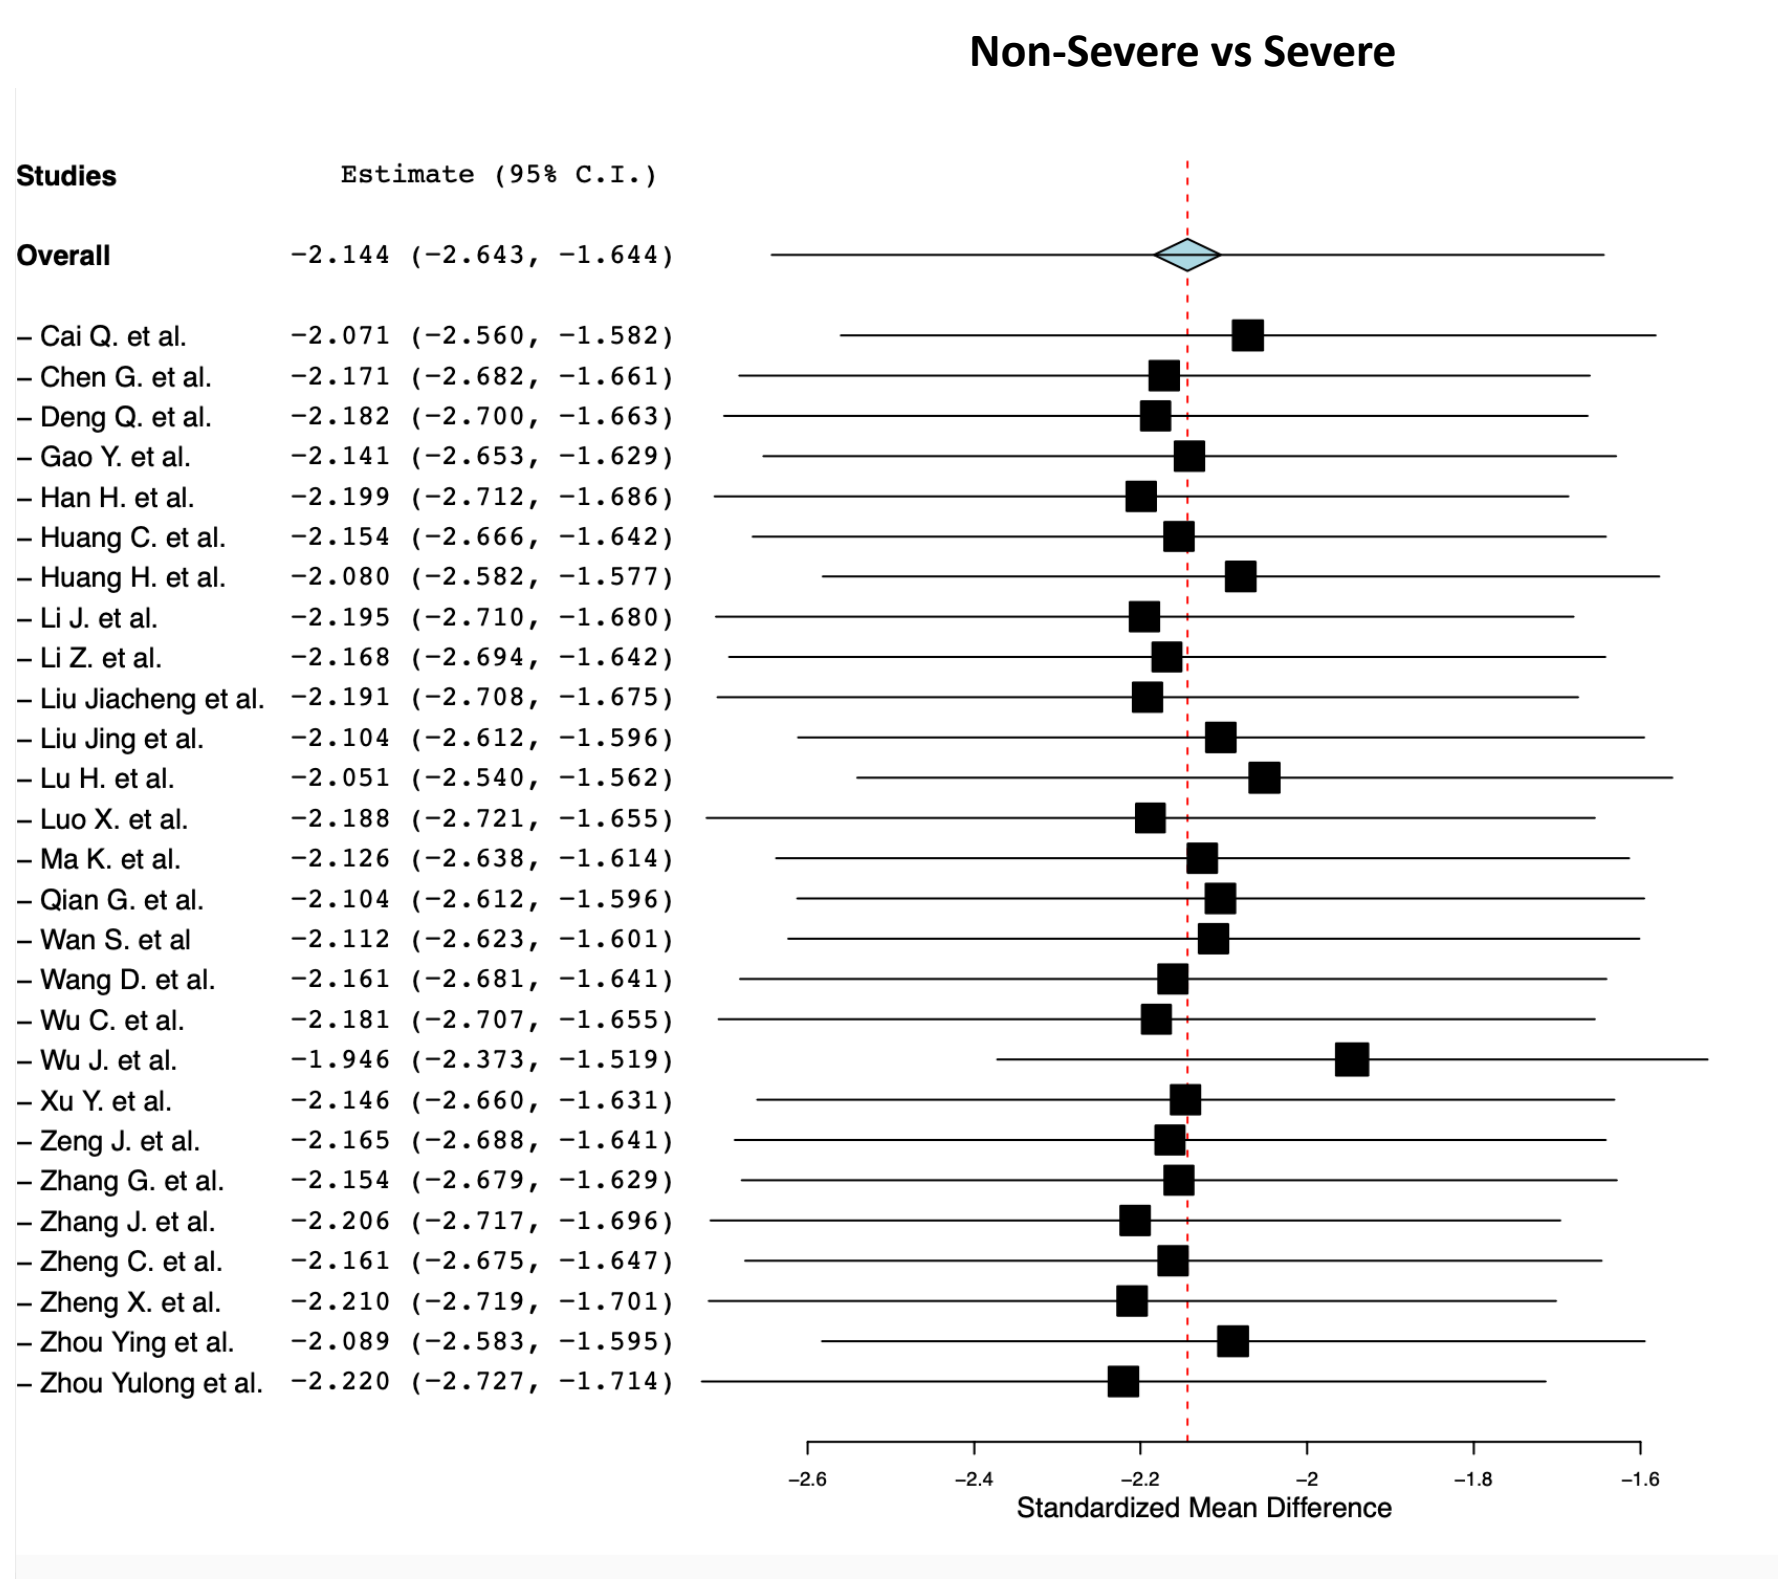

## B Sensitivity Analysis for D-dimer outcome

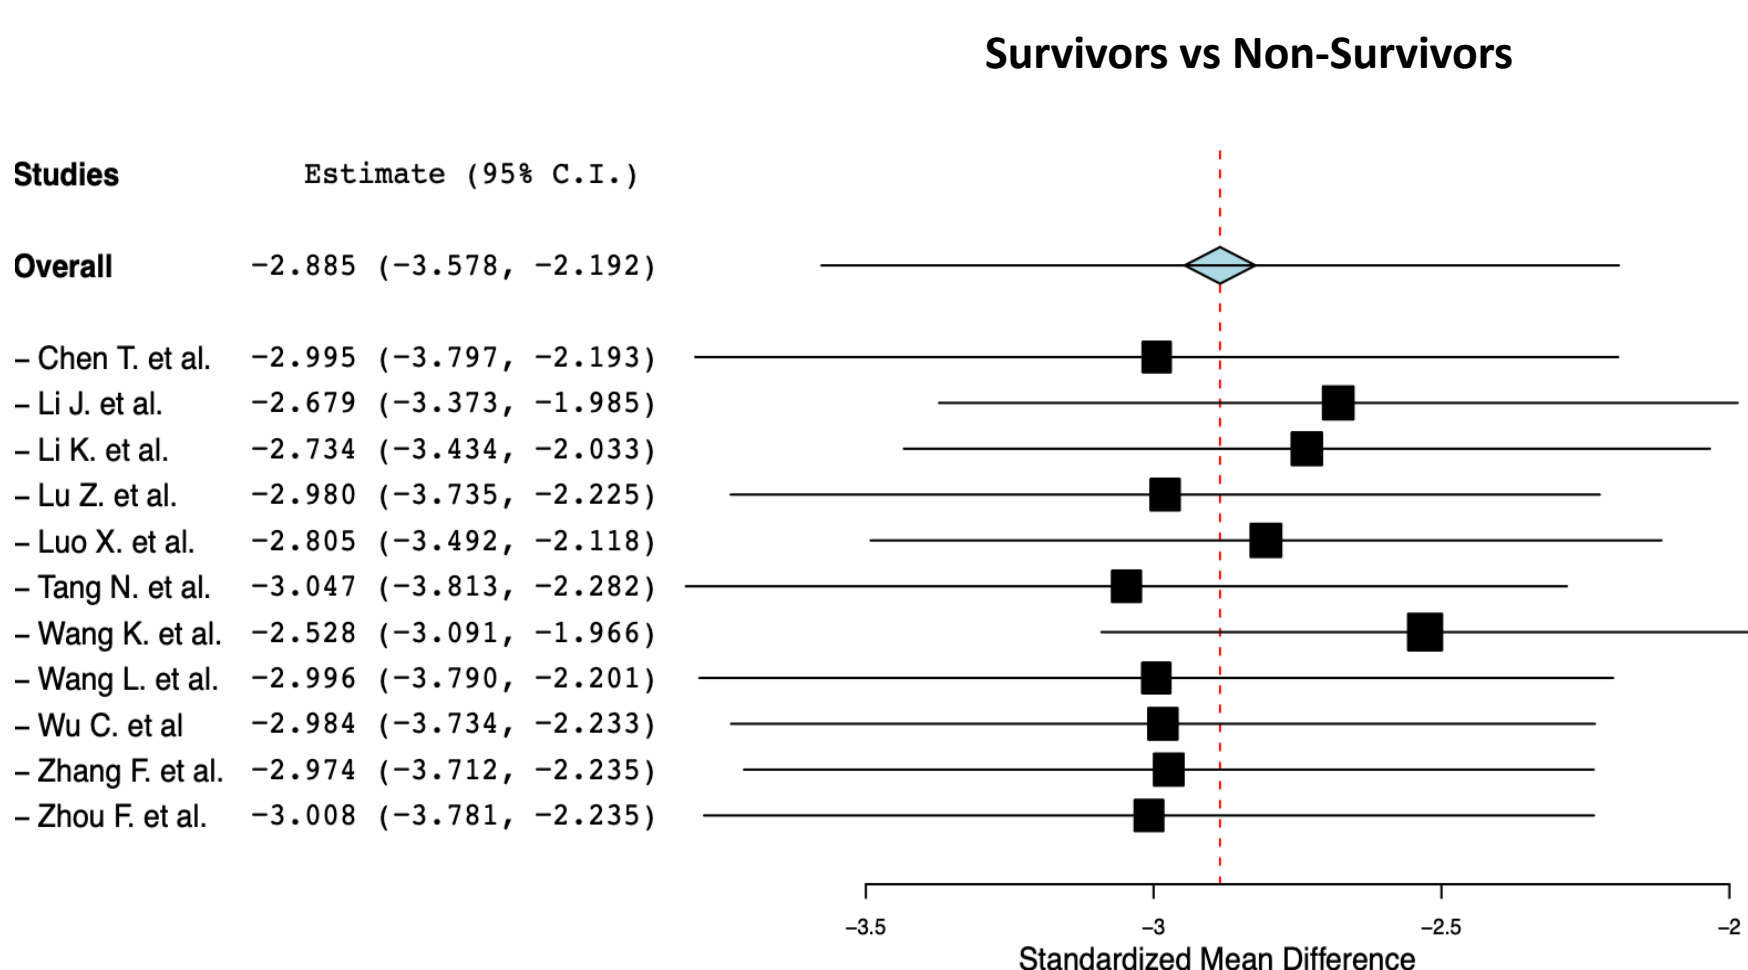



# Supplemental Figure 3

## A Fibrinogen

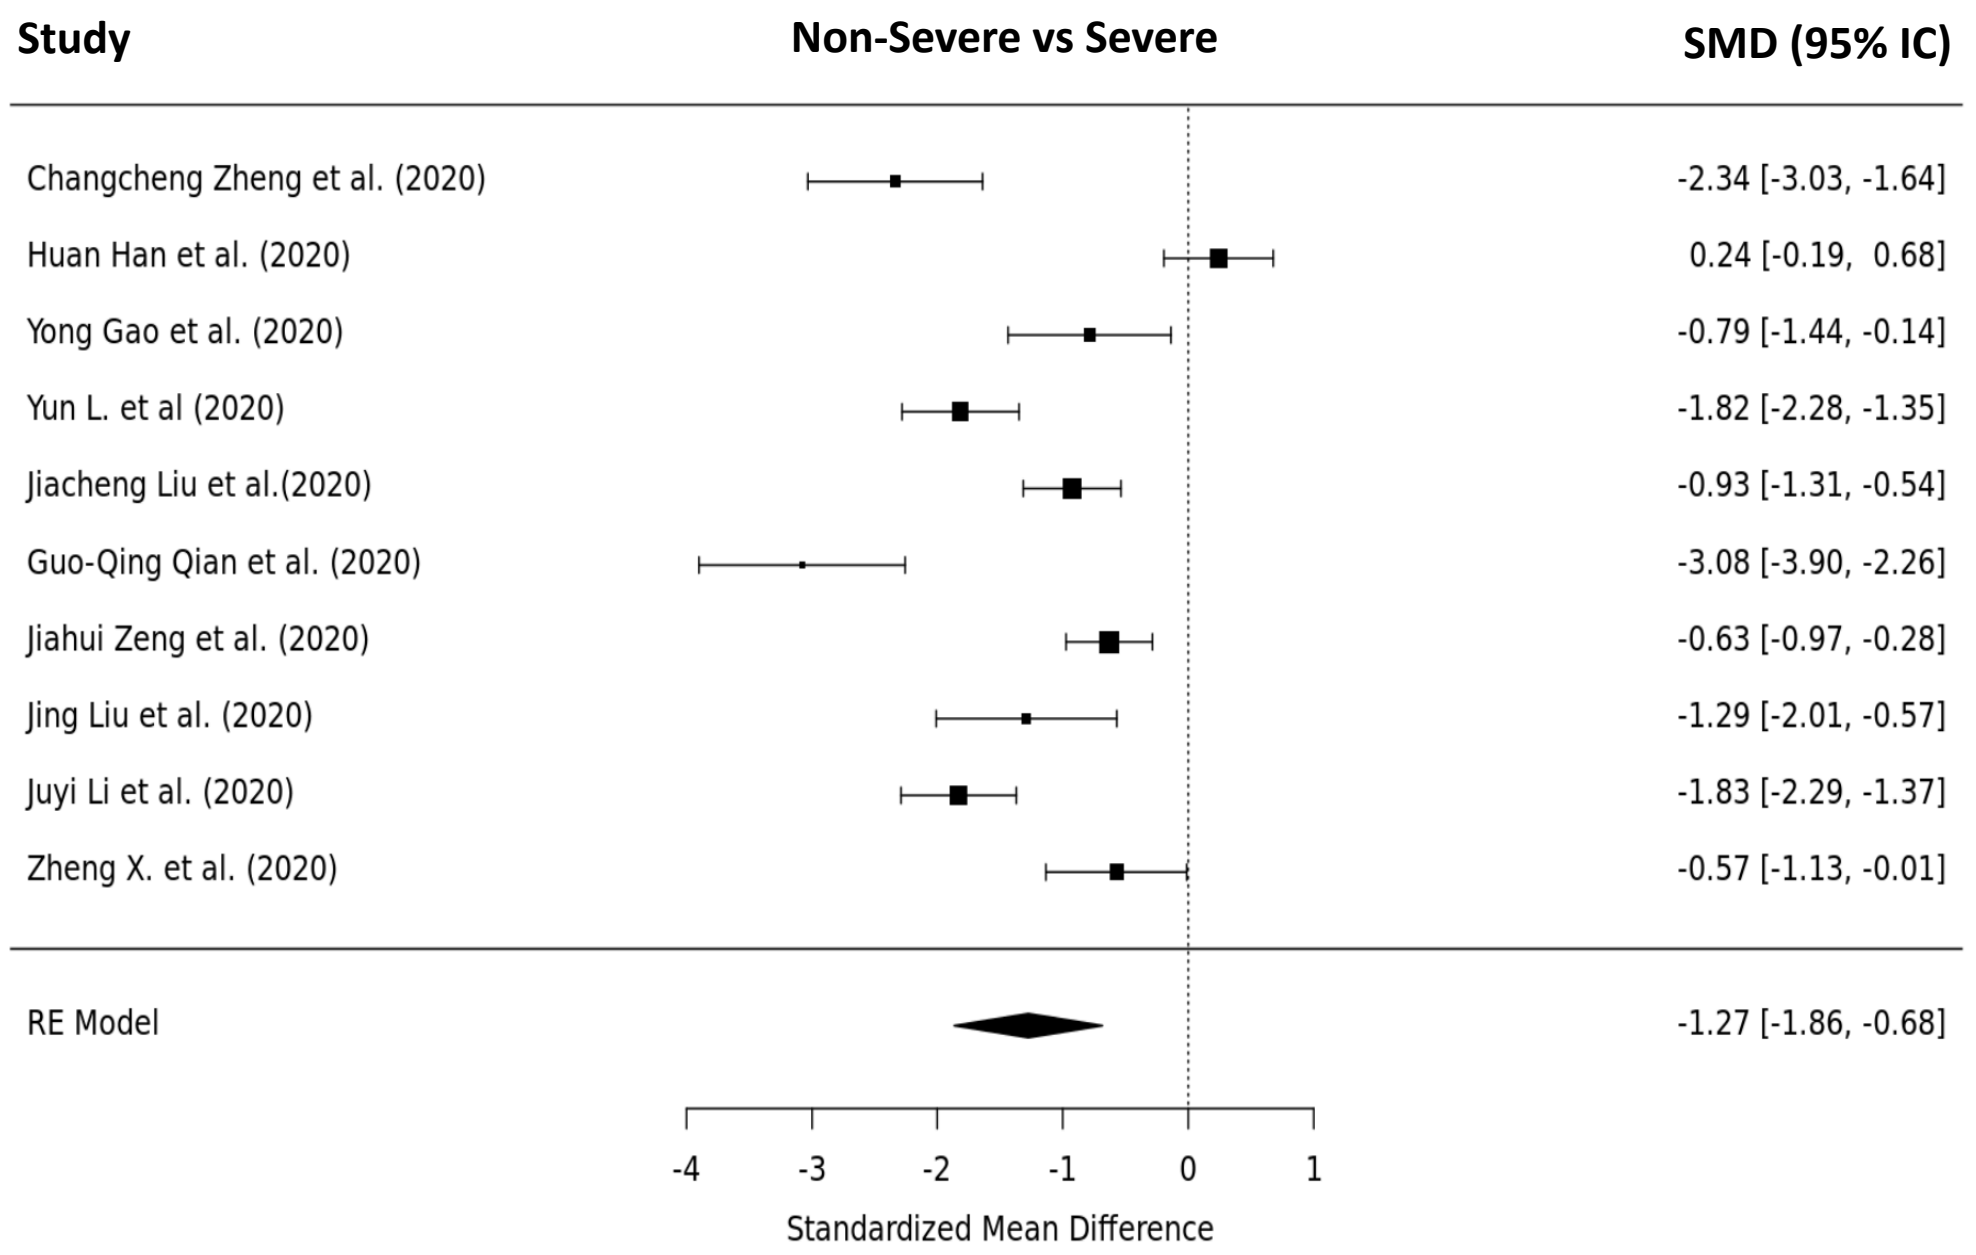

## B Fibrinogen

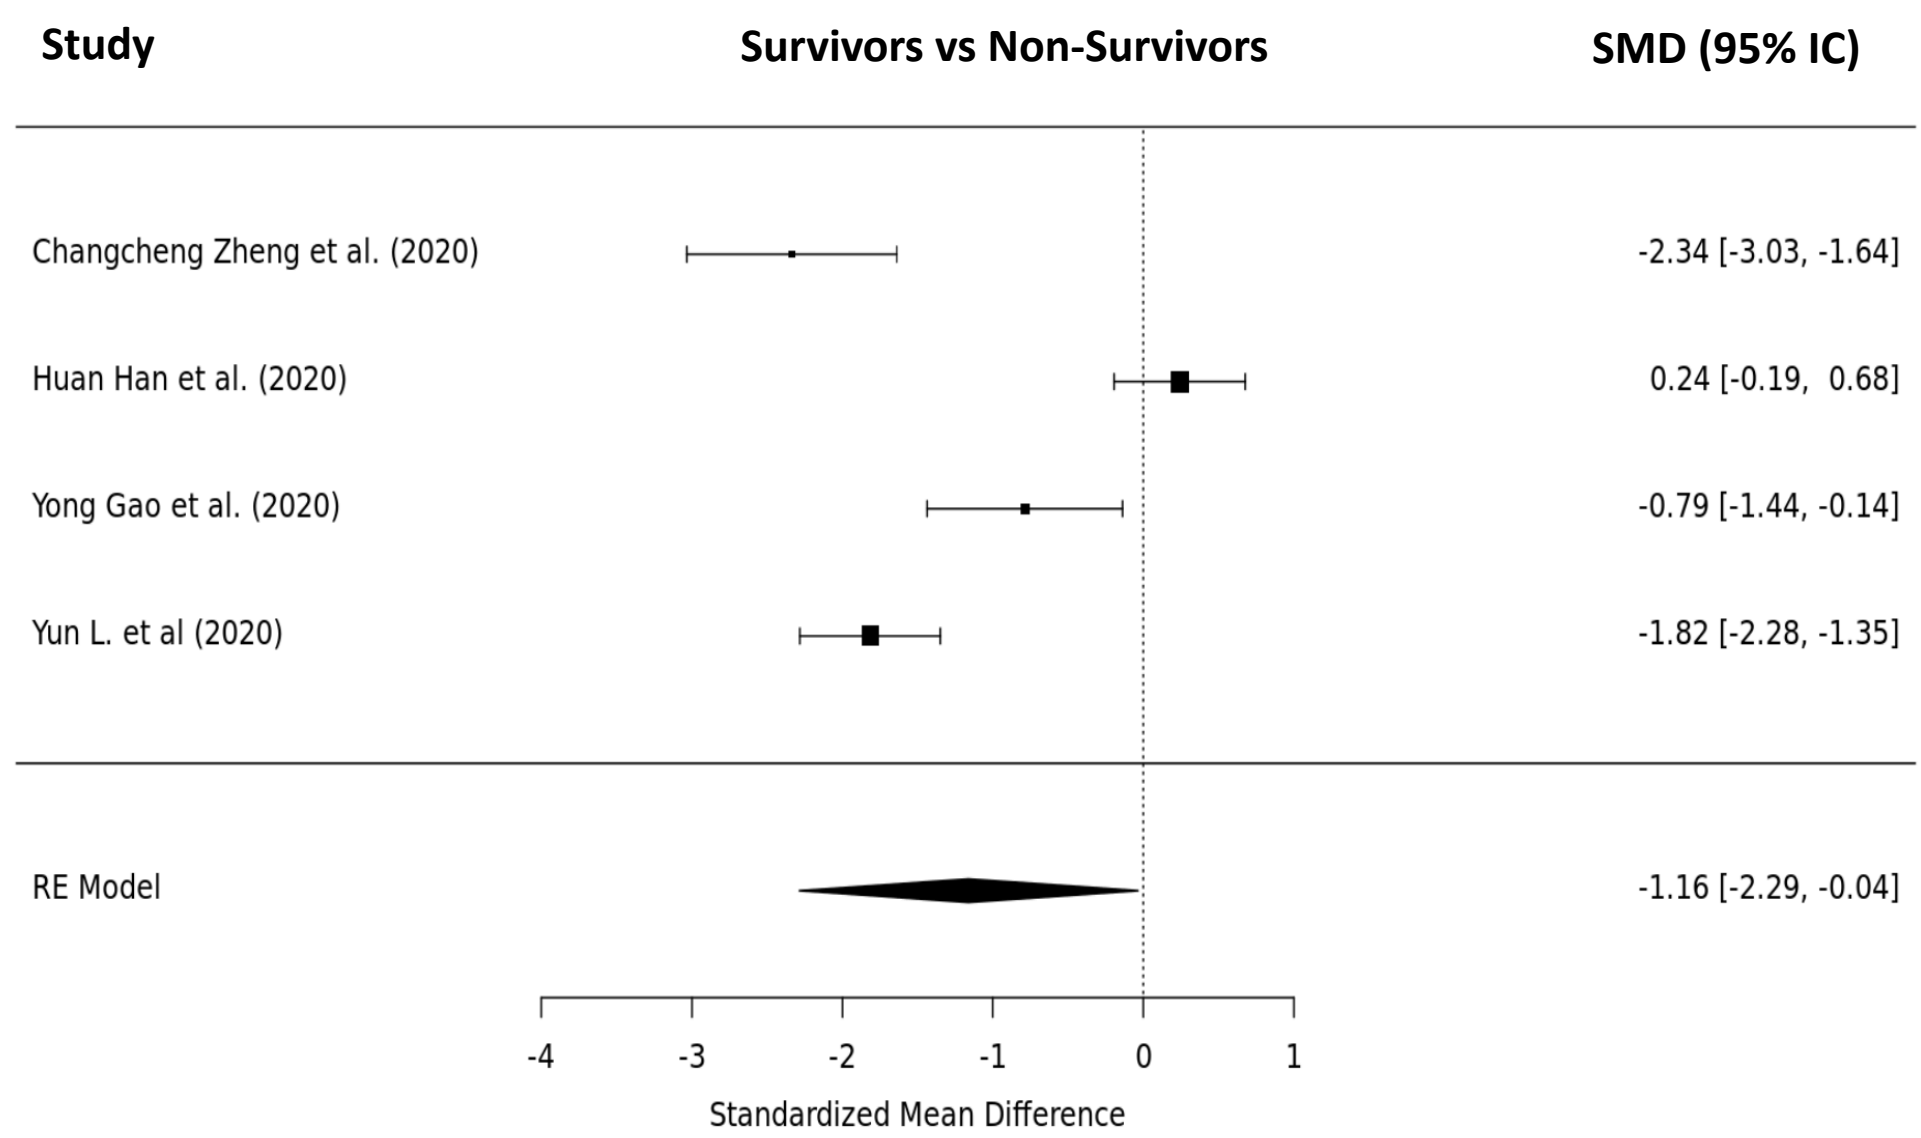

# Supplemental Figure 4

## Fibrin Degradation Product

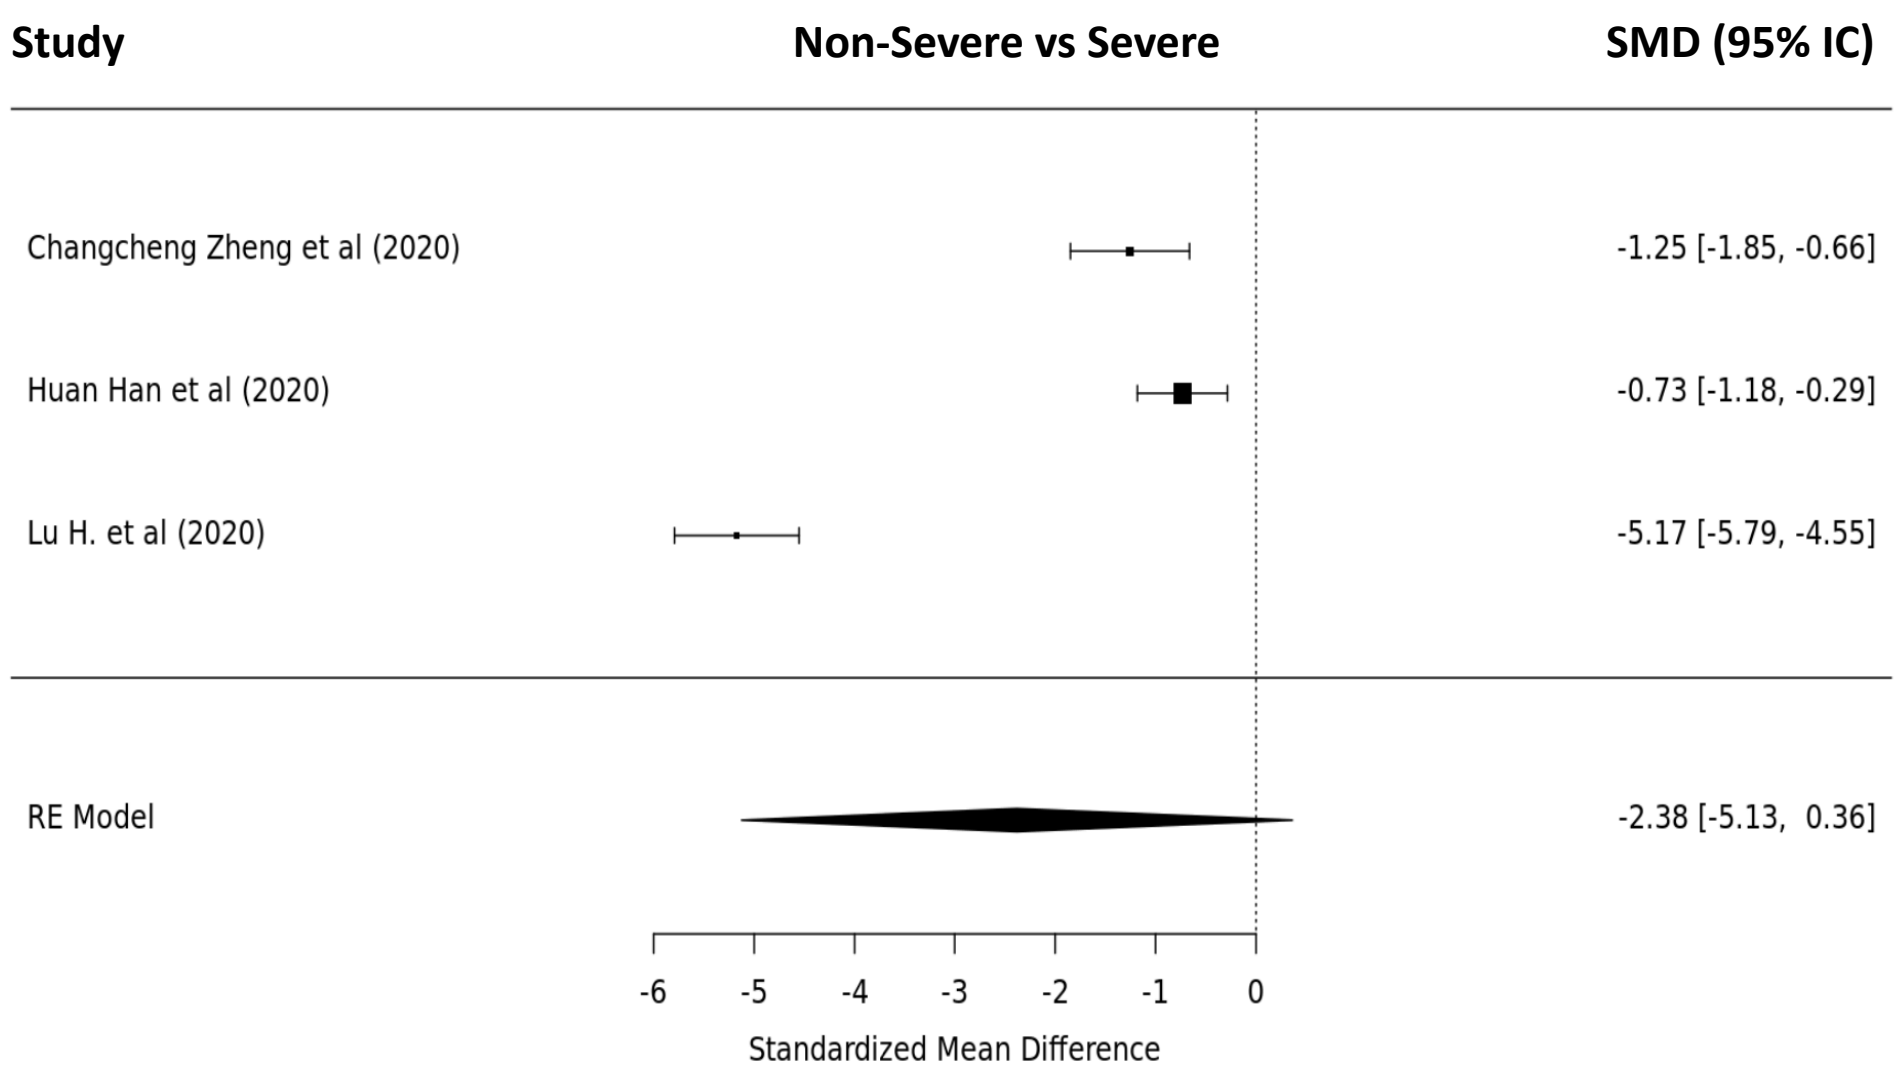

# Supplemental Figure 5

## International Normalized Ratio (INR)

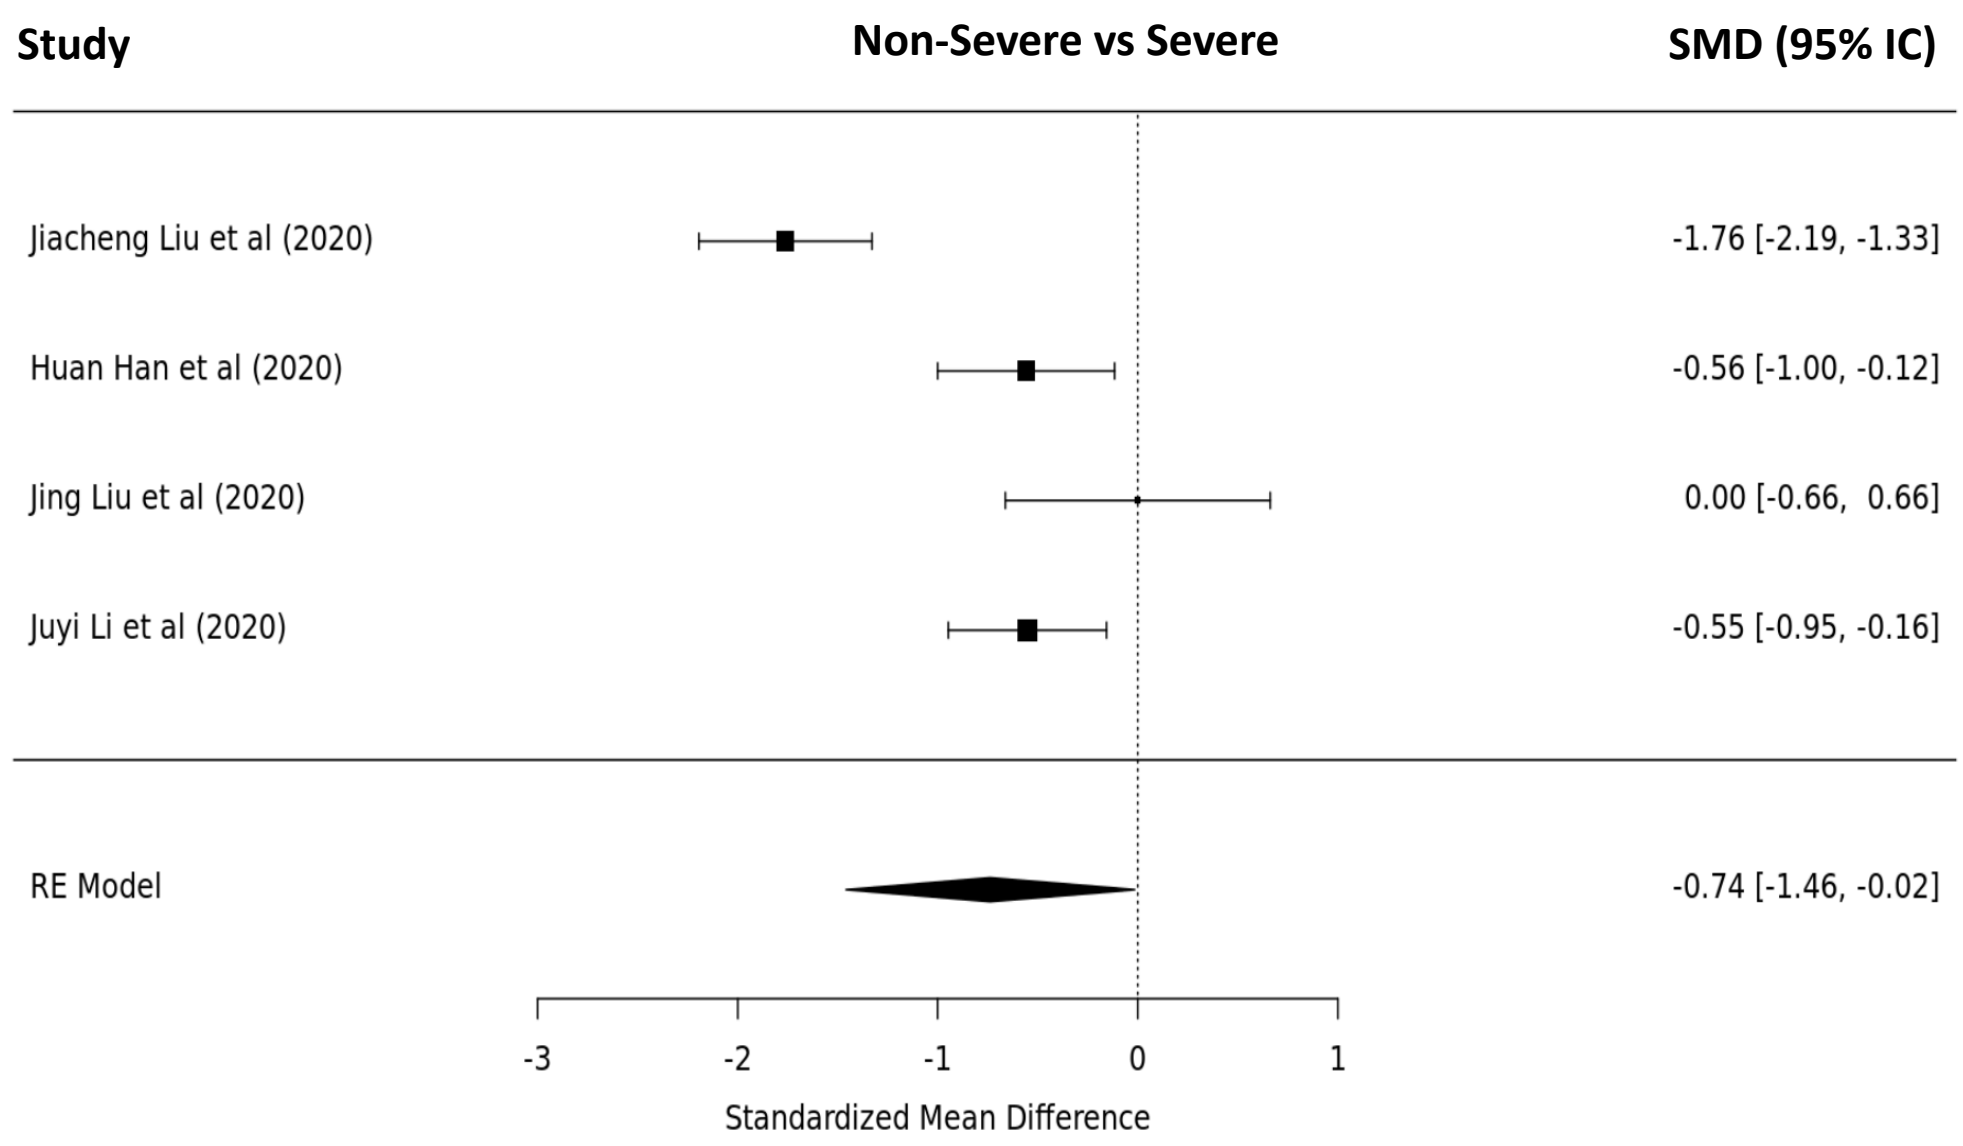

# Supplemental Figure 6

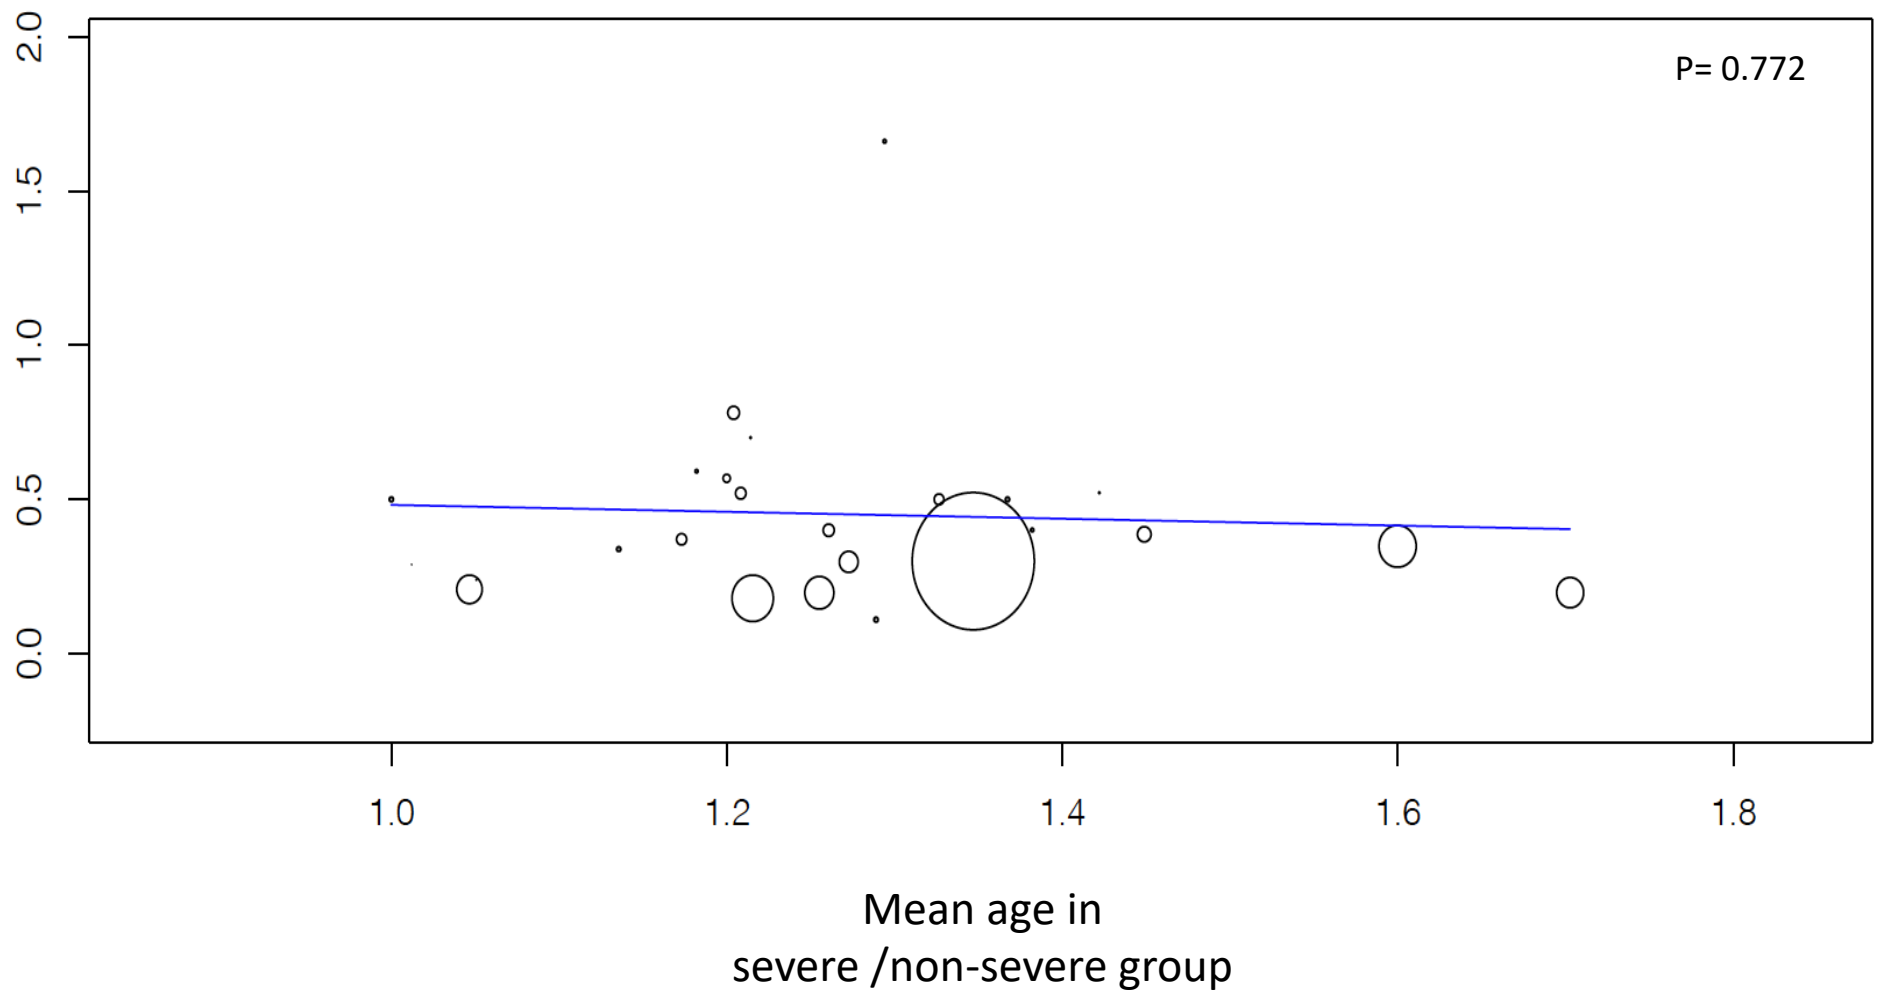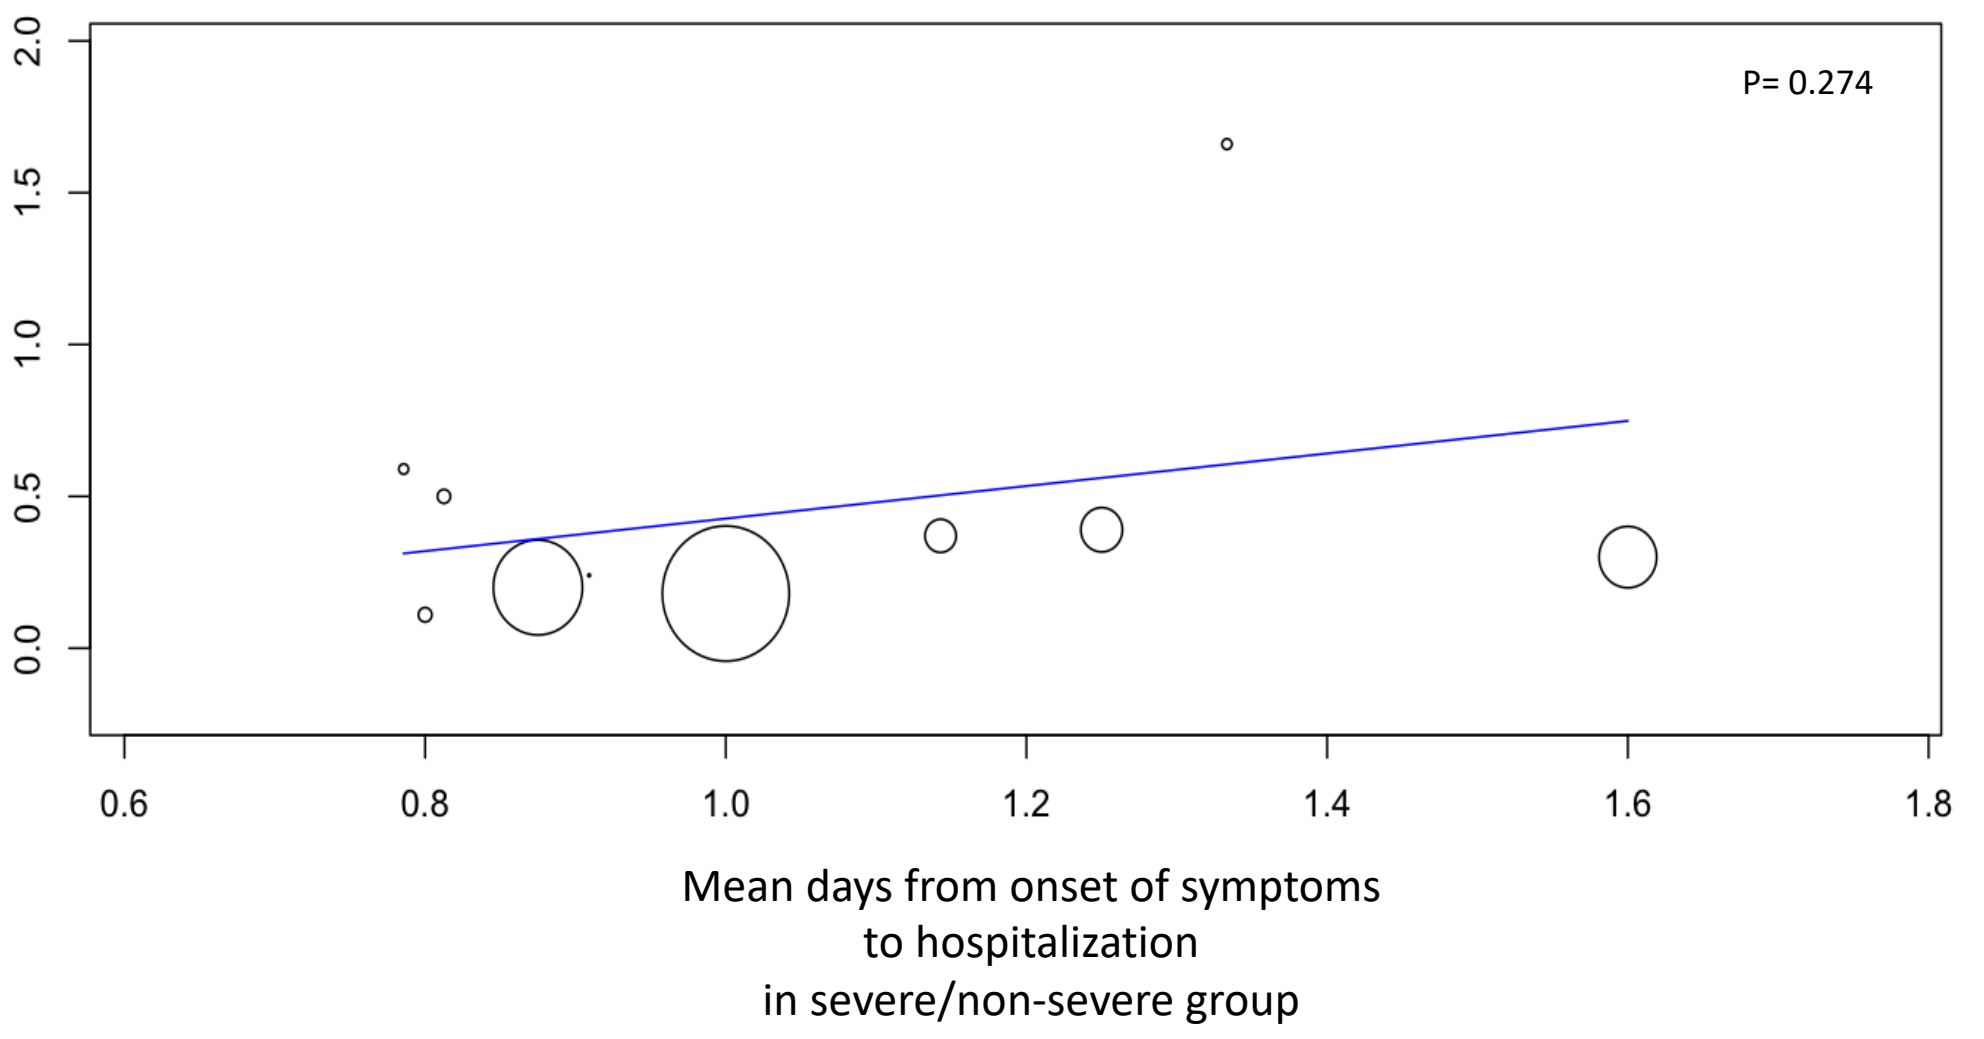

Supplement: 41598_2021_89967_MOESM2_ESM.pdf [file 41598_2021_89967_MOESM2_ESM.pdf]
